# Supplementary material
Source: PubMed Central journal article supplement (PMC7100612)
Supplement: EMS85578-supplement-Supplementary_table_1.pdf [file EMS85578-supplement-Supplementary_table_1.pdf]

Supplementary Table 1. **Lag times, elongation rates and fibril yield for  $\alpha$ Syn variants.**

The rates of aggregation in each condition were measured in at least triplicate. The errors show the standard deviation of the mean of the replicates. No aggregation after 100 h incubation is indicated by “-“. Given errors in estimating fibril yields via SDS PAGE subsequent to centrifugation (see Methods) gels, the values were rounded to the nearest 10%.

| $\alpha$ Syn variant       | WT                  |                |                     |                 | $\Delta$ P1         |                 |         |     |
|----------------------------|---------------------|----------------|---------------------|-----------------|---------------------|-----------------|---------|-----|
| pH                         | 4.5                 |                | 7.5                 |                 | 4.5                 |                 | 7.5     |     |
| Salt                       | 20                  | 200            | 20                  | 200             | 20                  | 200             | 20      | 200 |
| Lag time [h]               | 4.0 $\pm$ 0.5       | 11.4 $\pm$ 1.9 | 49.7 $\pm$ 7.2      | 61.3 $\pm$ 9.8  | 4.1 $\pm$ 0.5       | 19.5 $\pm$ 3.0  | -       | -   |
| Elongation rate [RFU/h]    | 35.6 $\pm$ 4.8      | 33.2 $\pm$ 2.5 | 1.7 $\pm$ 0.2       | 3.6 $\pm$ 0.2   | 30.1 $\pm$ 9.4      | 16.4 $\pm$ 3.4  | -       | -   |
| Fibril yield [% insoluble] | 90                  | 90             | 100                 | 100             | 100                 | 100             | 0       | 0   |
| $\alpha$ Syn variant       | $\Delta$ P2         |                |                     |                 | $\Delta\Delta$      |                 |         |     |
| pH                         | 4.5                 |                | 7.5                 |                 | 4.5                 |                 | 7.5     |     |
| Salt                       | 20                  | 200            | 20                  | 200             | 20                  | 200             | 20      | 200 |
| Lag time [h]               | 4.8 $\pm$ 0.4       | 14.2 $\pm$ 0.5 | 36.2 $\pm$ 1.7      | 45.4 $\pm$ 16.3 | 57.3 $\pm$ 3.6      | -               | -       | -   |
| Elongation rate [RFU/h]    | 44.2 $\pm$ 8.8      | 6.8 $\pm$ 1.8  | 2.3 $\pm$ 0.6       | 5.8 $\pm$ 0.7   | 22.9 $\pm$ 5.5      | -               | -       | -   |
| Fibril yield [% insoluble] | 100                 | 100            | 80                  | 100             | 90                  | 30              | 20      | 30  |
| $\alpha$ Syn variant       | $\Delta$ C1         |                |                     |                 | P1P2-GS             |                 |         |     |
| pH                         | 4.5                 |                | 7.5                 |                 | 4.5                 |                 | 7.5     |     |
| Salt                       | 20                  | 200            | 20                  | 200             | 20                  | 200             | 20      | 200 |
| Lag time [h]               | 0.47 $\pm$ 0.07     | 3.1 $\pm$ 0.1  | 20.5 $\pm$ 0.7      | 43.2 $\pm$ 4.3  | 11.4 $\pm$ 3.0      | 82.8 $\pm$ 12.7 | -       | -   |
| Elongation rate [RFU/h]    | 28.8 $\pm$ 11.0     | 38.3 $\pm$ 1.3 | 12.6 $\pm$ 1.4      | 19.6 $\pm$ 4.9  | 0.12 $\pm$ 0.03     | 0.06 $\pm$ 0.01 | -       | -   |
| Fibril yield [% insoluble] | 90                  | 90             | 80                  | 70              | 70                  | 20              | 0       | 0   |
| $\alpha$ Syn variant       | Seeding with WT     |                |                     |                 | Liposome            |                 |         |     |
| Condition                  | pH 7.5, 200 mM NaCl |                |                     |                 | pH 6.5              |                 |         |     |
| Monomer                    | WT                  | $\Delta$ P1    | $\Delta$ P2         | $\Delta\Delta$  | WT                  | $\Delta\Delta$  | P1P2-GS |     |
| Lag time [h]               | -0.89 $\pm$ 0.47    | -              | 24.5 $\pm$ 1.8      | -               | 4.9 $\pm$ 0.3       | 93.0 $\pm$ 2.6  | -       |     |
| Elongation rate [RFU/h]    | 24.0 $\pm$ 4.3      | -              | 7.2 $\pm$ 0.7       | -               | 5.7 $\pm$ 0.2       | 4.8 $\pm$ 0.3   | -       |     |
| $\alpha$ Syn variant       | V40C                |                | V52C                |                 | A140C               |                 |         |     |
| Condition                  | pH 4.5, 200 mM NaCl |                | pH 4.5, 200 mM NaCl |                 | pH 4.5, 200 mM NaCl |                 |         |     |
| State                      | monomer             | dimer          | monomer             | dimer           | monomer             | dimer           |         |     |
| Lag time [h]               | 17.1 $\pm$ 0.9      | -              | 6.9 $\pm$ 1.3       | 27.9 $\pm$ 2.7  | 12.7 $\pm$ 1.1      | 11.2 $\pm$ 2.0  |         |     |
| Elongation rate [RFU/h]    | 18.1 $\pm$ 2.5      | -              | 10.2 $\pm$ 0.4      | 5.7 $\pm$ 1.7   | 10.0 $\pm$ 1.4      | 9.0 $\pm$ 0.2   |         |     |
